# Supplementary material for: Preparation of carbon coated MoO2 nanobelts and their high performance as anode materials for lithium ion batteries
Source: Royal Society of Chemistry journal article supplement (doi:10.1039/c2jm31364b), 2012-01-01
Supplement: c2jm31364b.pdf [file c2jm31364b.pdf]

## Electronic Supplementary Information

Preparation of carbon coated MoO<sub>2</sub> nanobelts and its high performance as anode material for lithium ion batteries

Lichun Yang,<sup>a, b</sup> Lili Liu,<sup>a</sup> Yusong Zhu,<sup>a</sup> Xujiang Wang<sup>a</sup> and Yuping Wu<sup>\*a</sup>

<sup>a</sup> New Energy and Materials Laboratory (NEML), Department of Chemistry & Shanghai Key Laboratory of Molecular Catalysis and Innovative Materials, Fudan University, Shanghai 200433, China

<sup>b</sup> Institute for Integrative Nanosciences, IFW Dresden, Helmholtzstrasse 20, Dresden 01069, Germany

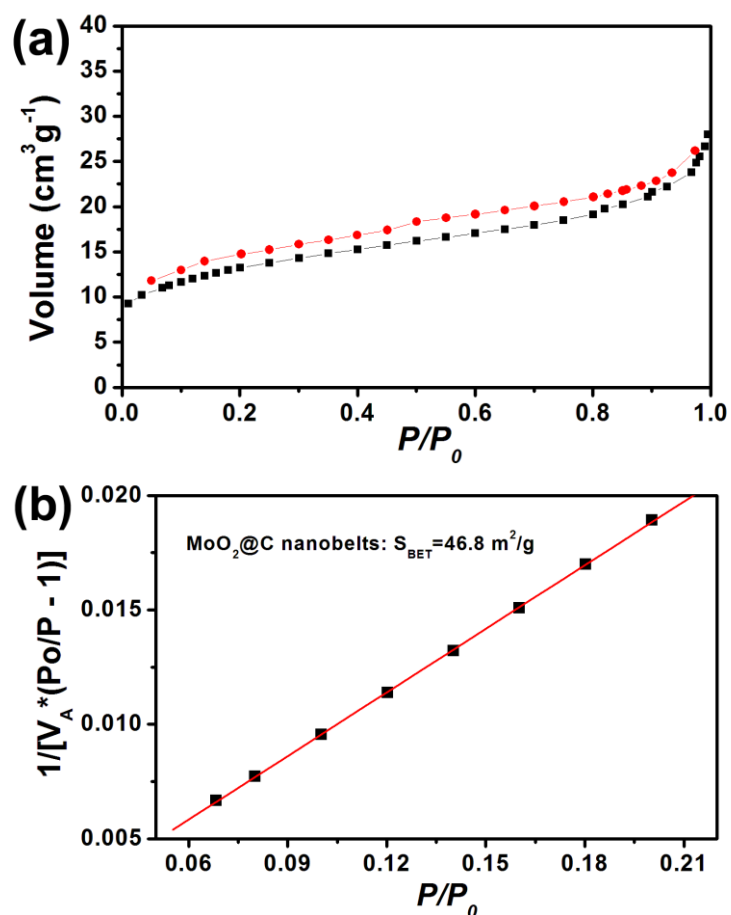

**Figure S1.** (a) N<sub>2</sub> adsorption-desorption isotherms of MoO<sub>2</sub>@C NBs, and (b) corresponding BET curve indicating the surface area of 46.8 m<sup>2</sup>/g.

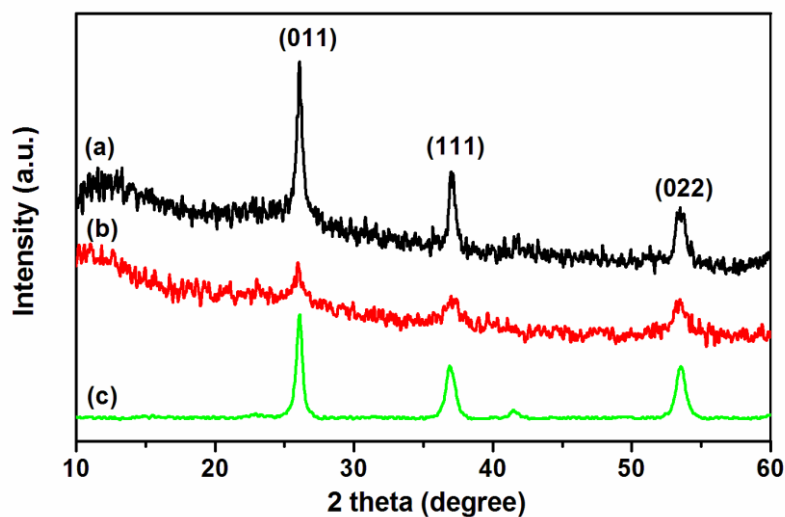

**Figure S2.** XRD patterns of products obtained through hydrothermal process in case of (a) without glucose, (b) without ethanol and (c) with low  $n_{\text{glucose/Mo}}$  of 1.71.

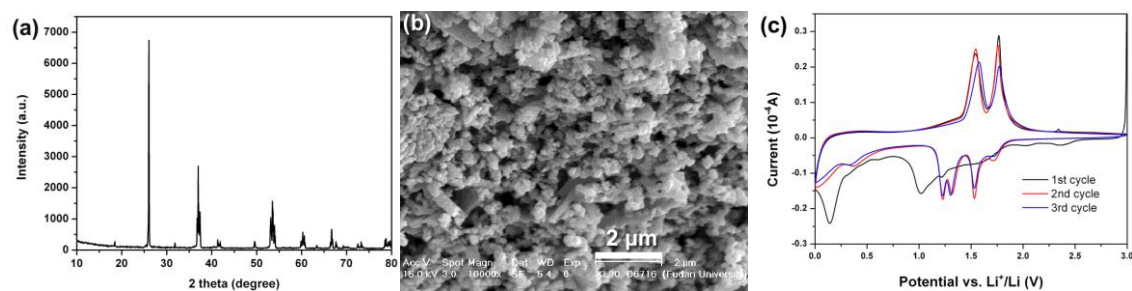

**Figure S3.** (a) XRD pattern, (b) SEM image and (c) CV curves of MoO<sub>2</sub> microplates purchased from Alfa Aesar. The scan rate of CV test is 0.1 mV/s.

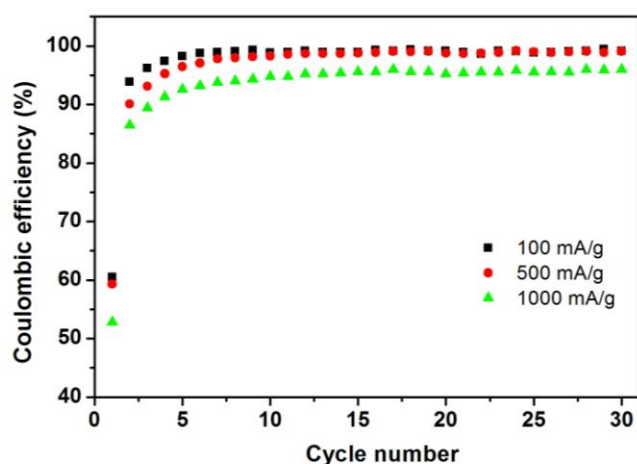

**Figure S4.** Coulombic efficiency of MoO<sub>2</sub>@C NBs during cycling performance in the range of 0.01~3 V vs. Li<sup>+</sup>/Li at different current densities.

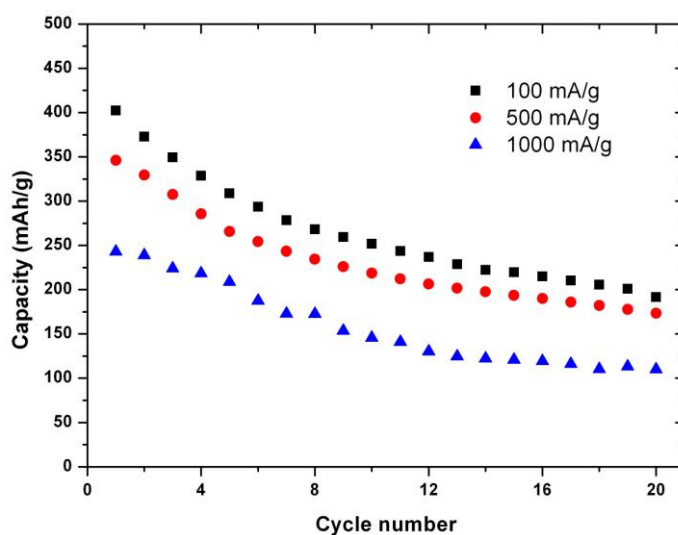

**Figure S5.** Cycling performance of commercial MoO<sub>2</sub> nanoparticles purchased from Alfa Aesar tested in the range of 0.01 - 3 V vs. metallic lithium.
